# Supplementary material for: The effects of low-ratio n-6/n-3 PUFA on biomarkers of inflammation: a systematic review and meta-analysis
Source: Royal Society of Chemistry journal article supplement (doi:10.1039/d0fo01976c), 2020-11-25
Supplement: d0fo01976c1.pdf [file d0fo01976c1.pdf]

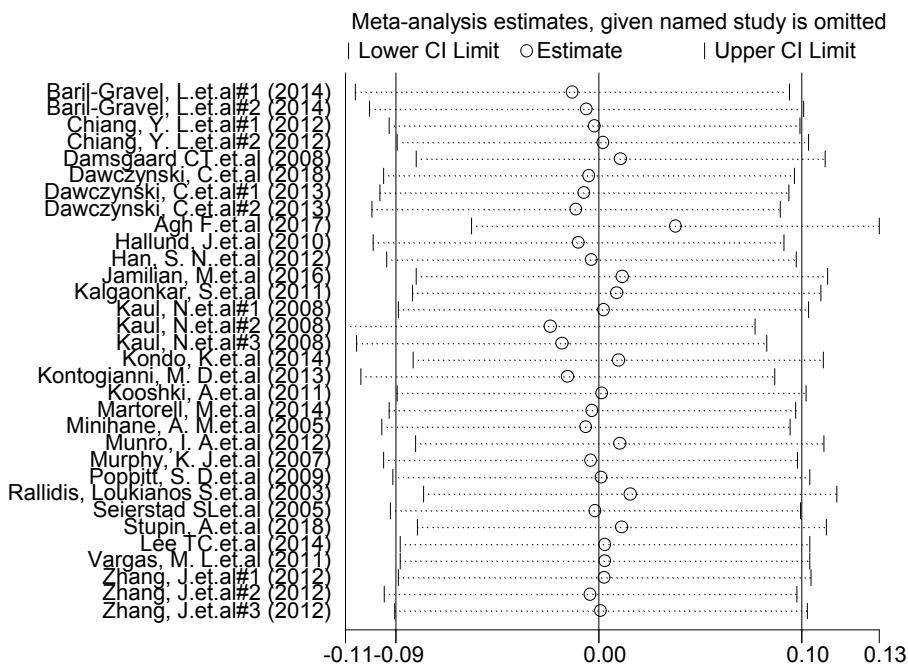

Fig. S1-Sensitivity analysis of CRP

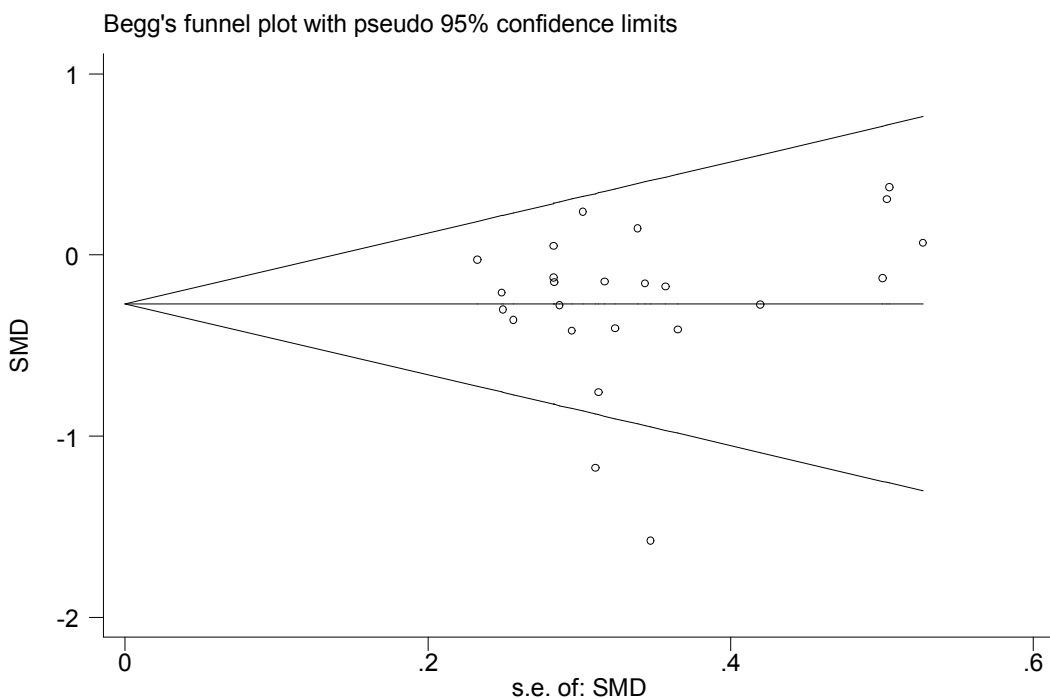

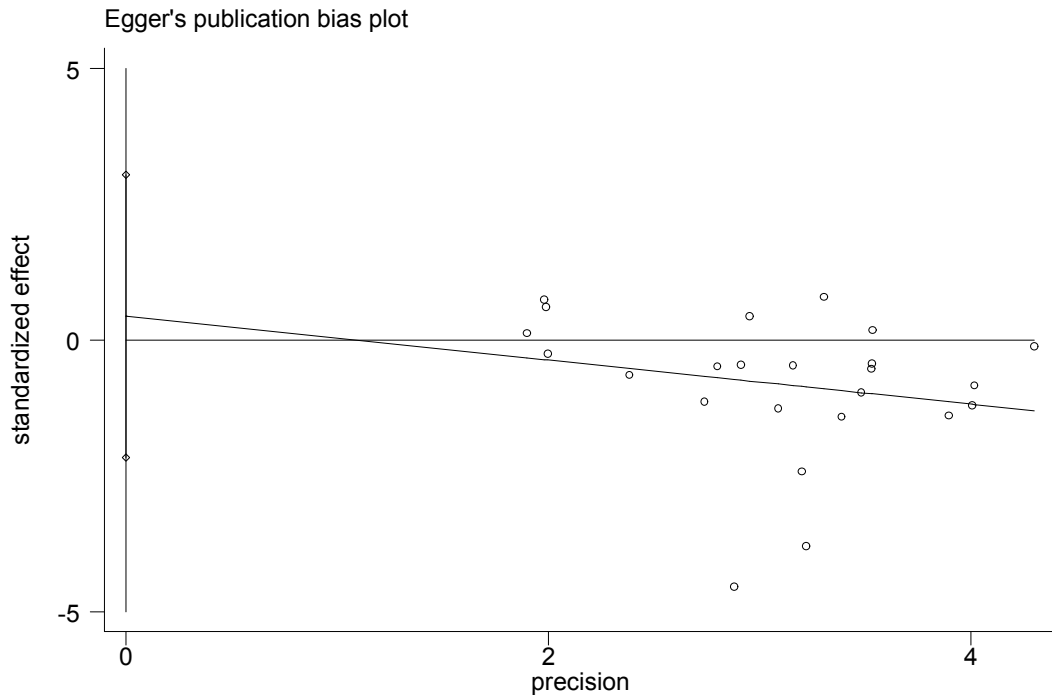

Fig. S2-The bias analysis of TNF- $\alpha$  in different n-6/n-3 PUFA ratios

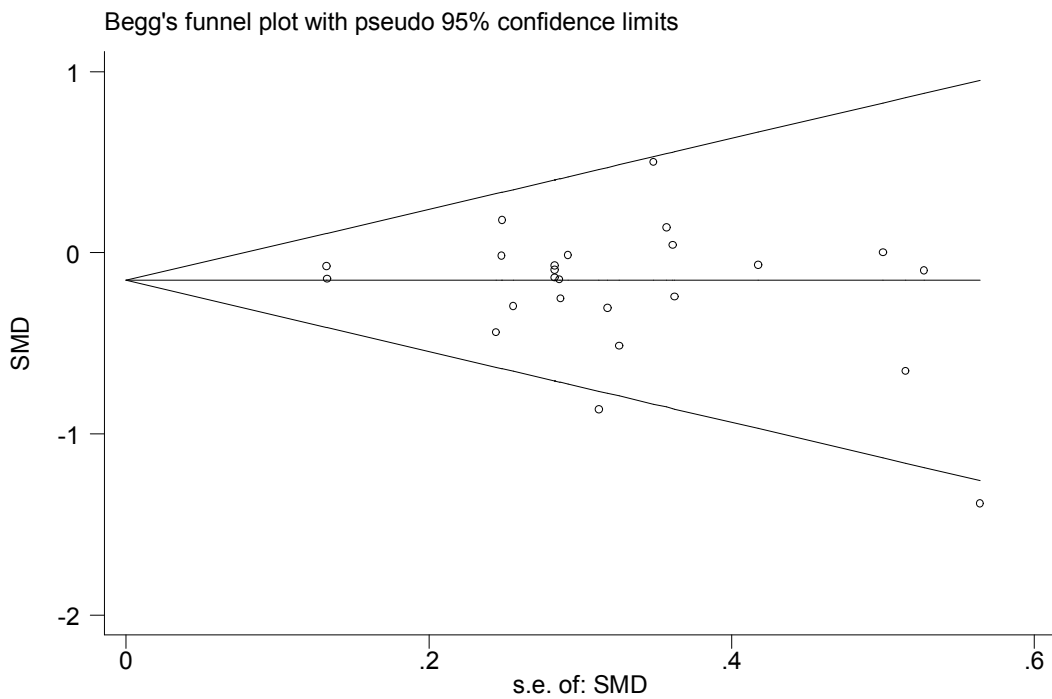

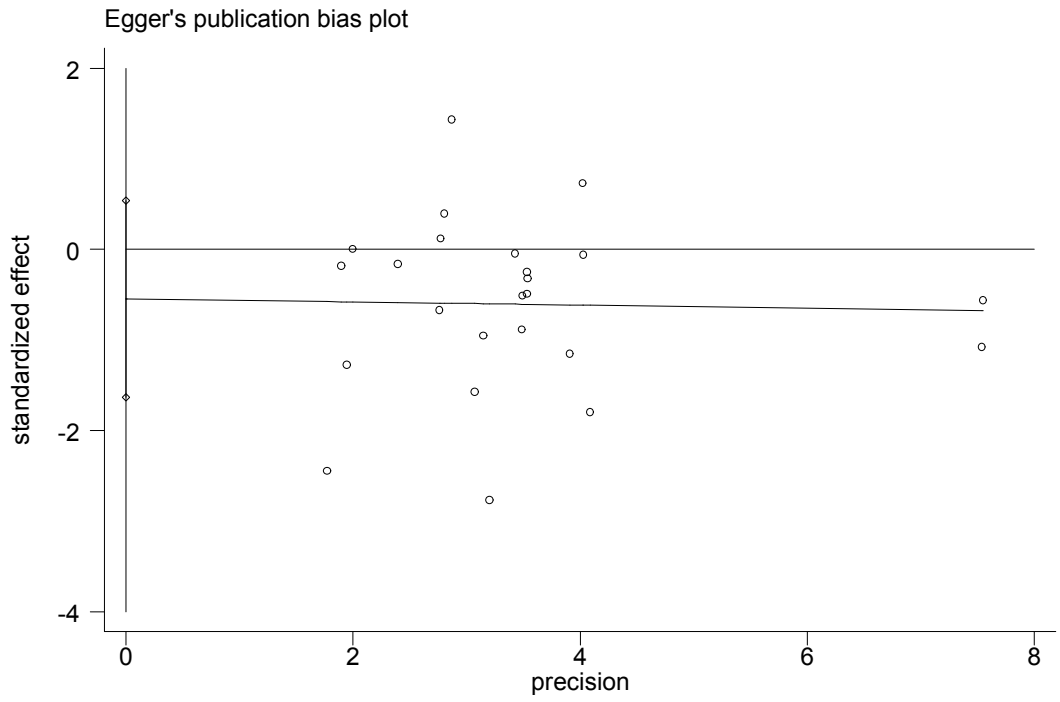

Fig. S3-The bias analysis of IL-6 in different n-6/n-3 PUFA ratios

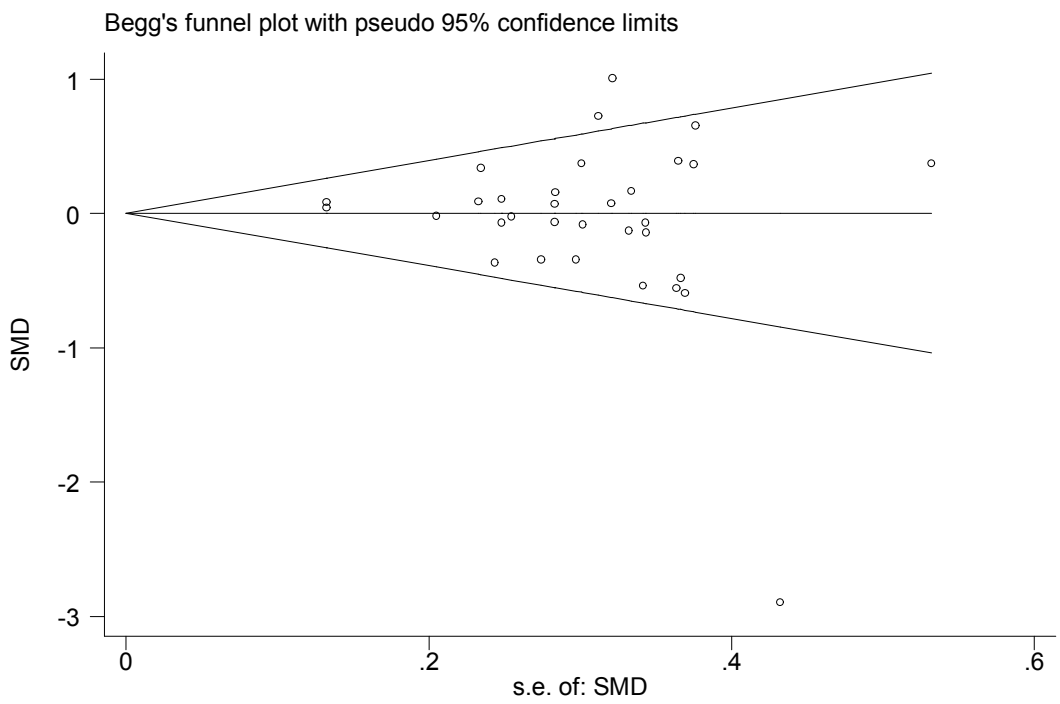

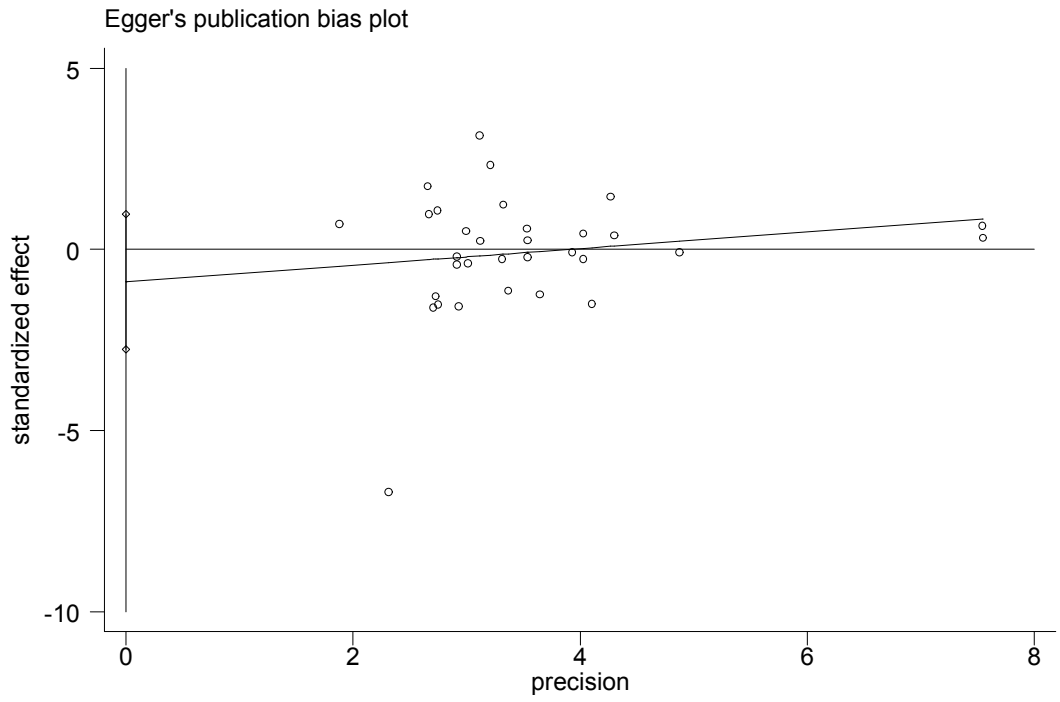

Fig. S4-The bias analysis of CRP in different n-6/n-3 PUFA ratios
